# Supplementary material for: Designing a σ0π2 singlet ground state carbene from dicationic carbones
Source: Royal Society of Chemistry journal article supplement (doi:10.1039/d4cc00492b), 2024-01-01
Supplement: d4cc00492b1.pdf [file d4cc00492b1.pdf]

- Supporting Information -

# Designing a $\sigma^0\pi^2$ singlet ground state carbene from dicationic carbones

*J. Philipp Wagner\**

Institut für Organische Chemie, Eberhard Karls Universität Tübingen, Auf der Morgenstelle 18,  
72076 Tübingen

\*Email: [Philipp.wagner@orgchem.uni-tuebingen.de](mailto:Philipp.wagner@orgchem.uni-tuebingen.de)

## Table of Contents

|                                                                |     |
|----------------------------------------------------------------|-----|
| 1. Computational methods .....                                 | S2  |
| 2. Optimized geometries, energies, and selected orbitals ..... | S3  |
| 2.1 Singlet dication <b>5</b> .....                            | S3  |
| 2.2 Triplet dication <b>5</b> .....                            | S5  |
| 2.3 Singlet dication <b>6</b> .....                            | S6  |
| 2.4 Triplet dication <b>6</b> .....                            | S8  |
| 2.5 Singlet dication <b>7</b> .....                            | S10 |
| 2.6 Triplet dication <b>7</b> .....                            | S11 |
| 2.7 Singlet dication <b>8</b> .....                            | S12 |
| 2.8 Triplet dication <b>8</b> .....                            | S14 |
| 2.9 Singlet dication <b>9</b> .....                            | S16 |
| 2.10 Triplet dication <b>9</b> .....                           | S18 |
| 2.11 Singlet dication <b>10</b> .....                          | S20 |
| 2.12 Triplet dication <b>10</b> .....                          | S22 |
| 2.13 Singlet dication <b>11</b> .....                          | S24 |
| 2.14 Triplet dication <b>11</b> .....                          | S26 |
| 2.15 Singlet dication <b>12</b> .....                          | S28 |
| 2.16 Triplet dication <b>12</b> .....                          | S30 |
| 2.17 <b>TS-H<sub>2</sub></b> .....                             | S32 |
|                                                                | S1  |

## 1. Computational methods

For all geometry optimizations, we utilized the B3LYP hybrid density functional<sup>1,2</sup> as implemented in the Gaussian16 electronic structure<sup>3</sup> code together with the D3-dispersion correction<sup>4</sup> and a def2-TZVPP basis set.<sup>5</sup> For open-shell systems (triplets), we employed an unrestricted Kohn-Sham formalism. Vibrational frequencies were computed in order to correct the electronic energy for effects of the zero-point vibrational motion and to assure the correct nature of the stationary structure; minima exhibit zero imaginary vibrational modes and transition states exactly one. More reliable energies were secured by applying the G4MP2 composite energy method.<sup>6</sup> NEVPT2 and CASSCF computations were performed with the ORCA 5 program employing a (2,2) active space.<sup>7</sup> The natural orbital analysis including natural resonance theory was executed with the NBO 6 software.<sup>8</sup>

## References

1. A. D. Becke, *J. Chem. Phys.*, 1993, **98**, 5648-5652.
2. P. J. Stephens, F. J. Devlin, C. F. Chabalowski and M. J. Frisch, *J. Chem. Phys.*, 1994, **98**, 11623-11627.
3. M. J. Frisch, G. W. Trucks, H. B. Schlegel, G. E. Scuseria, M. A. Robb, J. R. Cheeseman, G. Scalmani, V. Barone, B. Mennucci, G. A. Petersson, H. Nakatsuji, M. Caricato, X. Li, H. P. Hratchian, A. F. Izmaylov, J. Bloino, G. Zheng, J. L. Sonnenberg, M. Hada, M. Ehara, K. Toyota, R. Fukuda, J. Hasegawa, M. Ishida, T. Nakajima, Y. Honda, O. Kitao, H. Nakai, T. Vreven, J. A. Montgomery, J. E. Peralta, F. Ogliaro, M. Bearpark, J. J. Heyd, E. Brothers, K. N. Kudin, V. N. Staroverov, R. Kobayashi, J. Normand, K. Raghavachari, A. Rendell, J. C. Burant, S. S. Iyengar, J. Tomasi, M. Cossi, N. Rega, J. M. Millam, M. Klene, J. E. Knox, J. B. Cross, V. Bakken, C. Adamo, J. Jaramillo, R. Gomperts, R. E. Stratmann, O. Yazyev, A. J. Austin, R. Cammi, C. Pomelli, J. W. Ochterski, R. L. Martin, K. Morokuma, V. G. Zakrzewski, G. A. Voth, P. Salvador, J. J. Dannenberg, S. Dapprich, A. D. Daniels, Ö. Farkas, J. B. Foresman, J. V. Ortiz, J. Cioslowski and D. J. Fox, *Gaussian 16, Revision C.01*, Gaussian, Inc., Wallingford CT, 2016.
4. S. Grimme, J. Antony, S. Ehrlich and H. Krieg, *J. Chem. Phys.*, 2010, **132**, 154104.
5. F. Weigend and R. Ahlrichs, *Phys. Chem. Chem. Phys.*, 2005, **7**, 3297-3305.
6. L. A. Curtiss, P. C. Redfern and K. Raghavachari, *J. Chem. Phys.*, 2007, **127**.
7. F. Neese, *Wiley Interdiscip. Rev.-Comput. Mol. Sci.*, 2022, **12**, e1606.
8. E. D. Glendening, C. R. Landis and F. Weinhold, *J. Comput. Chem.*, 2013, **34**, 1429-1437.

## 2. Optimized geometries, energies, and selected orbitals

### 2.1 Singlet dication 5

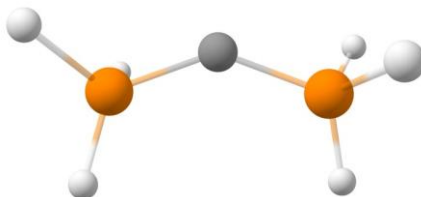

**Figure S1.** Optimized geometry of **15** (in Å) at the B3LYP-D3/def2-TZVPP level of theory. The electronic energy is given in units of  $E_h$  and the ZPVE in  $\text{kcal mol}^{-1}$ .

|    |              |              |              |
|----|--------------|--------------|--------------|
| 6  | 0.000000000  | 0.000000000  | 0.530898000  |
| 15 | 0.000000000  | 1.662608000  | -0.078638000 |
| 15 | 0.000000000  | -1.662608000 | -0.078638000 |
| 1  | -1.331400000 | 1.993925000  | 0.283707000  |
| 1  | 0.888777000  | 2.381920000  | 0.744513000  |
| 1  | -0.888777000 | -2.381920000 | 0.744513000  |
| 1  | 0.215633000  | 1.952340000  | -1.441351000 |
| 1  | -0.215633000 | -1.952340000 | -1.441351000 |
| 1  | 1.331400000  | -1.993925000 | 0.283707000  |

B3LYP-D3/def2-TZVPP: -723.5914106

ZPVE: 35.86643

G4MP2(0K): -722.569273

### Selected orbitals

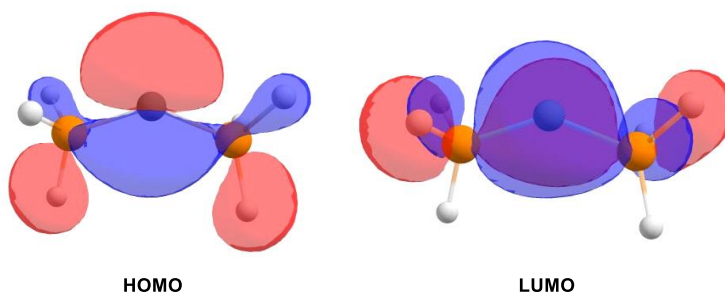

### Natural resonance theory

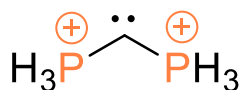

76.4%

## CASSCF results

-----  
CAS-SCF STATES FOR BLOCK 1 MULT= 3 NROOTS= 1  
-----

ROOT 0: E= -722.0811155682 Eh  
1.00000 [ 0]: 11

-----  
CAS-SCF STATES FOR BLOCK 2 MULT= 1 NROOTS= 3  
-----

ROOT 0: E= -722.0417734872 Eh  
0.89269 [ 0]: 20  
0.10731 [ 2]: 02  
ROOT 1: E= -722.0224359133 Eh 0.526 eV 4244.1 cm\*\*<sup>-1</sup>  
1.00000 [ 1]: 11  
ROOT 2: E= -721.9469766245 Eh 2.580 eV 20805.5 cm\*\*<sup>-1</sup>  
0.89269 [ 2]: 02  
0.10731 [ 0]: 20

-----  
NEVPT2 TOTAL ENERGIES  
-----

| STATE | ROOT | MULT | Energy/a.u. | MRCI SOC BLOCK INPUT (cm** <sup>-1</sup> ) |
|-------|------|------|-------------|--------------------------------------------|
| 0:    | 0    | 3    | -722.481219 | EDIAG[0] -158566299.280155                 |
| 1:    | 0    | 1    | -722.452570 | EDIAG[1] -158560011.473332                 |
| 2:    | 1    | 1    | -722.432635 | EDIAG[2] -158555636.157829                 |
| 3:    | 2    | 1    | -722.363633 | EDIAG[3] -158540492.076119                 |

## 2.2 Triplet dication 5

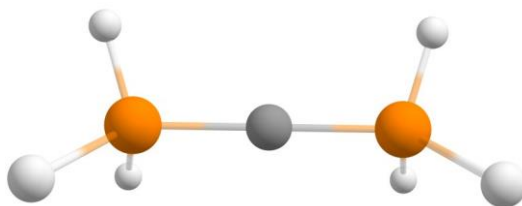

**Figure S2.** Optimized geometry of  ${}^3\mathbf{5}$  (in Å) at the B3LYP-D3/def2-TZVPP level of theory. The electronic energy is given in units of  $E_h$  and the ZPVE in  $\text{kcal mol}^{-1}$ .

|    |              |              |              |
|----|--------------|--------------|--------------|
| 6  | 0.000000000  | 0.000000000  | 0.000000000  |
| 15 | 0.000000000  | 0.000000000  | 1.751352000  |
| 15 | 0.000000000  | 0.000000000  | -1.751352000 |
| 1  | 0.000000000  | 1.331175000  | 2.208277000  |
| 1  | -1.152831000 | -0.665587000 | 2.208277000  |
| 1  | 0.000000000  | 1.331175000  | -2.208277000 |
| 1  | 1.152831000  | -0.665587000 | 2.208277000  |
| 1  | 1.152831000  | -0.665587000 | -2.208277000 |
| 1  | -1.152831000 | -0.665587000 | -2.208277000 |

B3LYP-D3/def2-TZVPP: -723.6320821

ZPVE: 36.52287

G4MP2(0K): -722.606049

### Selected orbitals (ROKS)

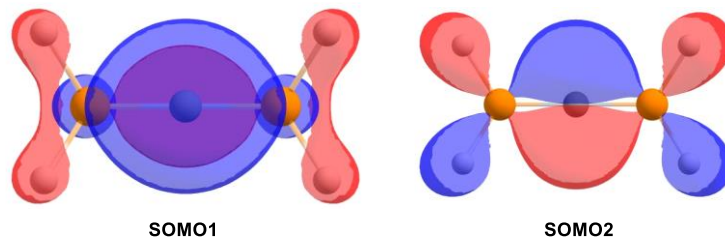

## 2.3 Singlet dication 6

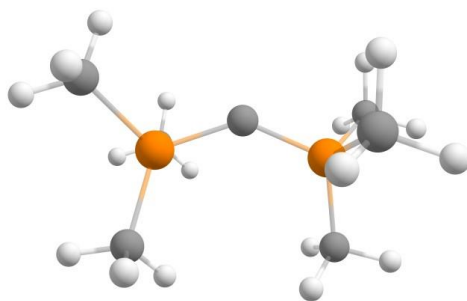

**Figure S3.** Optimized geometry of  ${}^1\mathbf{6}$  (in Å) at the B3LYP-D3/def2-TZVPP level of theory. The electronic energy is given in units of  $E_h$  and the ZPVE in  $\text{kcal mol}^{-1}$ .

|    |              |              |              |
|----|--------------|--------------|--------------|
| 6  | 0.000000000  | 0.000000000  | 0.675275000  |
| 15 | -1.115128000 | 1.191484000  | 0.040841000  |
| 6  | -1.614968000 | 1.138023000  | -1.690332000 |
| 1  | -0.743701000 | 1.165743000  | -2.343112000 |
| 1  | -2.199081000 | 0.237967000  | -1.884486000 |
| 1  | -2.243987000 | 2.006518000  | -1.897896000 |
| 6  | -2.559958000 | 1.289272000  | 1.105041000  |
| 1  | -3.147259000 | 2.159364000  | 0.803989000  |
| 1  | -3.170882000 | 0.394124000  | 0.984790000  |
| 1  | -2.246989000 | 1.386324000  | 2.143185000  |
| 6  | 0.000000000  | 2.614384000  | 0.327734000  |
| 1  | 0.911886000  | 2.541310000  | -0.262082000 |
| 1  | -0.574047000 | 3.479502000  | -0.023796000 |
| 1  | 0.221575000  | 2.725390000  | 1.386311000  |
| 15 | 1.115128000  | -1.191484000 | 0.040841000  |
| 6  | 1.614968000  | -1.138023000 | -1.690332000 |
| 1  | 0.743701000  | -1.165743000 | -2.343112000 |
| 1  | 2.199081000  | -0.237967000 | -1.884486000 |
| 1  | 2.243987000  | -2.006518000 | -1.897896000 |
| 6  | 0.000000000  | -2.614384000 | 0.327734000  |
| 1  | -0.221575000 | -2.725390000 | 1.386311000  |
| 1  | -0.911886000 | -2.541310000 | -0.262082000 |
| 1  | 0.574047000  | -3.479502000 | -0.023796000 |
| 6  | 2.559958000  | -1.289272000 | 1.105041000  |
| 1  | 3.170882000  | -0.394124000 | 0.984790000  |
| 1  | 2.246989000  | -1.386324000 | 2.143185000  |
| 1  | 3.147259000  | -2.159364000 | 0.803989000  |

B3LYP-D3/def2-TZVPP: -959.7992534

ZPVE: 144.63428

G4MP2(0K): -958.225479

## Selected orbitals

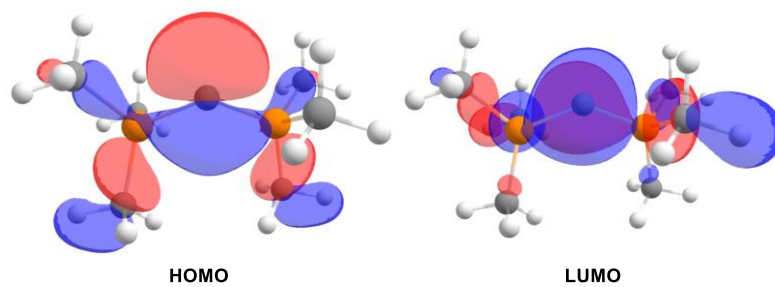

## Natural resonance theory

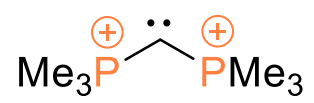

61.4%

## 2.4 Triplet dication 6

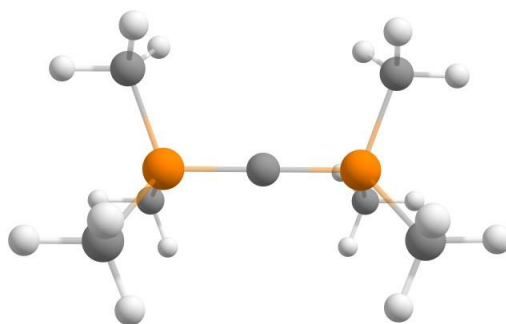

**Figure S4.** Optimized geometry of  ${}^3\mathbf{6}$  (in Å) at the B3LYP-D3/def2-TZVPP level of theory. The electronic energy is given in units of  $E_h$  and the ZPVE in  $\text{kcal mol}^{-1}$ .

|    |              |              |              |
|----|--------------|--------------|--------------|
| 6  | 0.000000000  | 0.000000000  | 0.000000000  |
| 15 | 0.000000000  | 0.000000000  | 1.756395000  |
| 6  | 0.000000000  | 1.707911000  | 2.328485000  |
| 1  | 0.893084000  | 2.224850000  | 1.979601000  |
| 1  | -0.893084000 | 2.224850000  | 1.979601000  |
| 1  | 0.000000000  | 1.691506000  | 3.420912000  |
| 6  | -1.479095000 | -0.853956000 | 2.328485000  |
| 1  | -1.464887000 | -0.845753000 | 3.420912000  |
| 1  | -2.373318000 | -0.338992000 | 1.979601000  |
| 1  | -1.480235000 | -1.885858000 | 1.979601000  |
| 6  | 1.479095000  | -0.853956000 | 2.328485000  |
| 1  | 2.373318000  | -0.338992000 | 1.979601000  |
| 1  | 1.464887000  | -0.845753000 | 3.420912000  |
| 1  | 1.480235000  | -1.885858000 | 1.979601000  |
| 15 | 0.000000000  | 0.000000000  | -1.756395000 |
| 6  | 0.000000000  | 1.707911000  | -2.328485000 |
| 1  | -0.893084000 | 2.224850000  | -1.979601000 |
| 1  | 0.893084000  | 2.224850000  | -1.979601000 |
| 1  | 0.000000000  | 1.691506000  | -3.420912000 |
| 6  | -1.479095000 | -0.853956000 | -2.328485000 |
| 1  | -1.480235000 | -1.885858000 | -1.979601000 |
| 1  | -2.373318000 | -0.338992000 | -1.979601000 |
| 1  | -1.464887000 | -0.845753000 | -3.420912000 |
| 6  | 1.479095000  | -0.853956000 | -2.328485000 |
| 1  | 2.373318000  | -0.338992000 | -1.979601000 |
| 1  | 1.480235000  | -1.885858000 | -1.979601000 |
| 1  | 1.464887000  | -0.845753000 | -3.420912000 |

B3LYP-D3/def2-TZVPP: -959.8333022  
ZPVE: 145.14166  
G4MP2(0K): -958.262911



## Selected orbitals (ROKS)

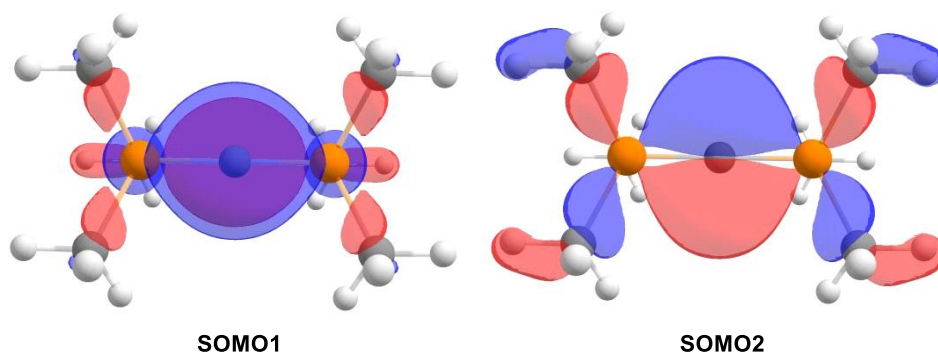

## 2.5 Singlet dication 7

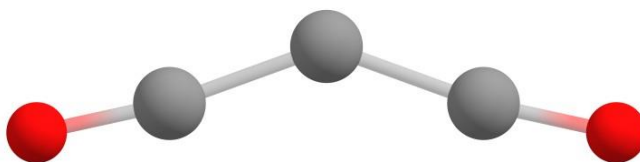

**Figure S5.** Optimized geometry of **17** (in Å) at the B3LYP-D3/def2-TZVPP level of theory. The electronic energy is given in units of  $E_h$  and the ZPVE in  $\text{kcal mol}^{-1}$ .

|   |             |              |              |
|---|-------------|--------------|--------------|
| 6 | 0.000000000 | 0.000000000  | 0.498145000  |
| 6 | 0.000000000 | 1.296342000  | 0.030024000  |
| 8 | 0.000000000 | 2.392742000  | -0.209322000 |
| 6 | 0.000000000 | -1.296342000 | 0.030024000  |
| 8 | 0.000000000 | -2.392742000 | -0.209322000 |

B3LYP-D3/def2-TZVPP: -263.7419526

ZPVE: 11.76049

G4MP2(0K): -263.345817

### Selected orbitals

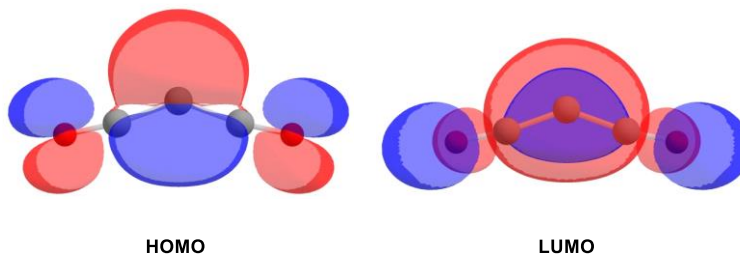

### Natural resonance theory

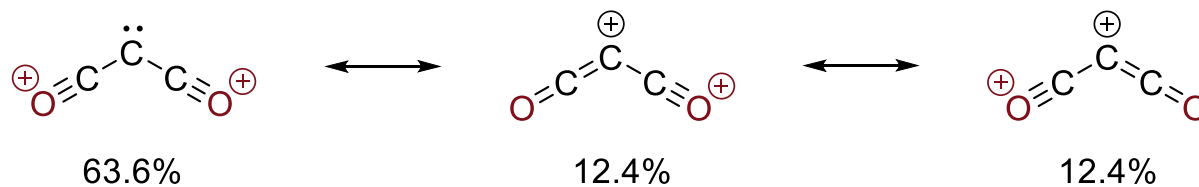

## 2.6 Triplet dication 7

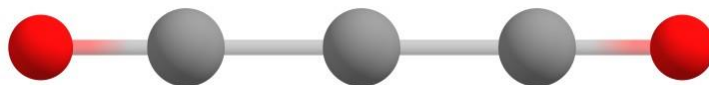

**Figure S6.** Optimized geometry of  ${}^37$  (in Å) at the B3LYP-D3/def2-TZVPP level of theory. The electronic energy is given in units of  $E_h$  and the ZPVE in  $\text{kcal mol}^{-1}$ .

|   |             |             |              |
|---|-------------|-------------|--------------|
| 6 | 0.000000000 | 0.000000000 | 0.000000000  |
| 6 | 0.000000000 | 0.000000000 | 1.356771000  |
| 8 | 0.000000000 | 0.000000000 | 2.479026000  |
| 6 | 0.000000000 | 0.000000000 | -1.356771000 |
| 8 | 0.000000000 | 0.000000000 | -2.479026000 |

B3LYP-D3/def2-TZVPP: -263.7849443

ZPVE: 11.7795

G4MP2(0K): -263.381361

### Selected orbitals (UKS)

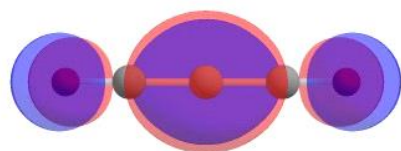

SOMO1

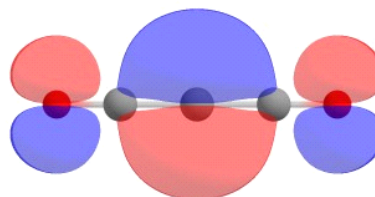

SOMO2

## 2.7 Singlet dication 8

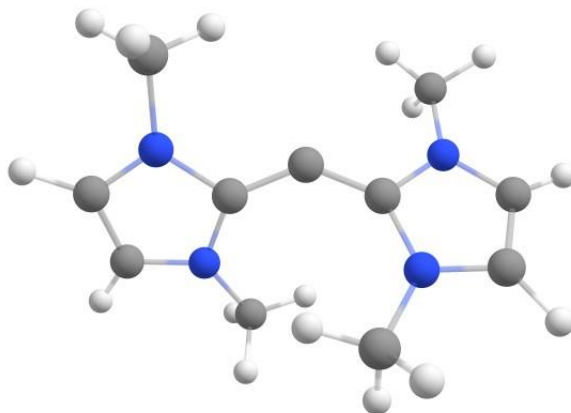

**Figure S7.** Optimized geometry of **18** (in Å) at the B3LYP-D3/def2-TZVPP level of theory. The electronic energy is given in units of  $E_h$  and the ZPVE in  $\text{kcal mol}^{-1}$ .

|   |              |              |              |
|---|--------------|--------------|--------------|
| 6 | 0.000000000  | 0.000000000  | 0.719110000  |
| 6 | 0.000000000  | 1.266070000  | 0.203414000  |
| 6 | 0.000000000  | -1.266070000 | 0.203414000  |
| 7 | -0.454364000 | 2.364983000  | 0.922313000  |
| 7 | 0.545467000  | 1.807998000  | -0.960705000 |
| 7 | -0.545467000 | -1.807998000 | -0.960705000 |
| 7 | 0.454364000  | -2.364983000 | 0.922313000  |
| 6 | -0.240833000 | 3.491075000  | 0.230053000  |
| 6 | 0.436878000  | 3.146818000  | -0.930126000 |
| 6 | -0.436878000 | -3.146818000 | -0.930126000 |
| 6 | 0.240833000  | -3.491075000 | 0.230053000  |
| 1 | -0.556505000 | 4.461775000  | 0.573917000  |
| 1 | 0.853763000  | 3.784887000  | -1.691733000 |
| 1 | -0.853763000 | -3.784887000 | -1.691733000 |
| 1 | 0.556505000  | -4.461775000 | 0.573917000  |
| 6 | -1.282088000 | -1.078953000 | -1.999268000 |
| 1 | -1.440796000 | -0.056038000 | -1.678930000 |
| 1 | -0.715280000 | -1.099287000 | -2.927594000 |
| 1 | -2.247846000 | -1.554371000 | -2.152810000 |
| 6 | 1.122632000  | -2.282251000 | 2.225368000  |
| 1 | 0.948764000  | -3.211029000 | 2.760740000  |
| 1 | 2.190624000  | -2.127998000 | 2.085642000  |
| 1 | 0.701198000  | -1.438695000 | 2.765538000  |
| 6 | 1.282088000  | 1.078953000  | -1.999268000 |
| 1 | 1.440796000  | 0.056038000  | -1.678930000 |
| 1 | 0.715280000  | 1.099287000  | -2.927594000 |
| 1 | 2.247846000  | 1.554371000  | -2.152810000 |
| 6 | -1.122632000 | 2.282251000  | 2.225368000  |
| 1 | -0.948764000 | 3.211029000  | 2.760740000  |
| 1 | -2.190624000 | 2.127998000  | 2.085642000  |
| 1 | -0.701198000 | 1.438695000  | 2.765538000  |

B3LYP-D3/def2-TZVPP: -647.430387  
ZPVE: 165.82089  
G4MP2(0K): -646.153037

### Selected orbitals

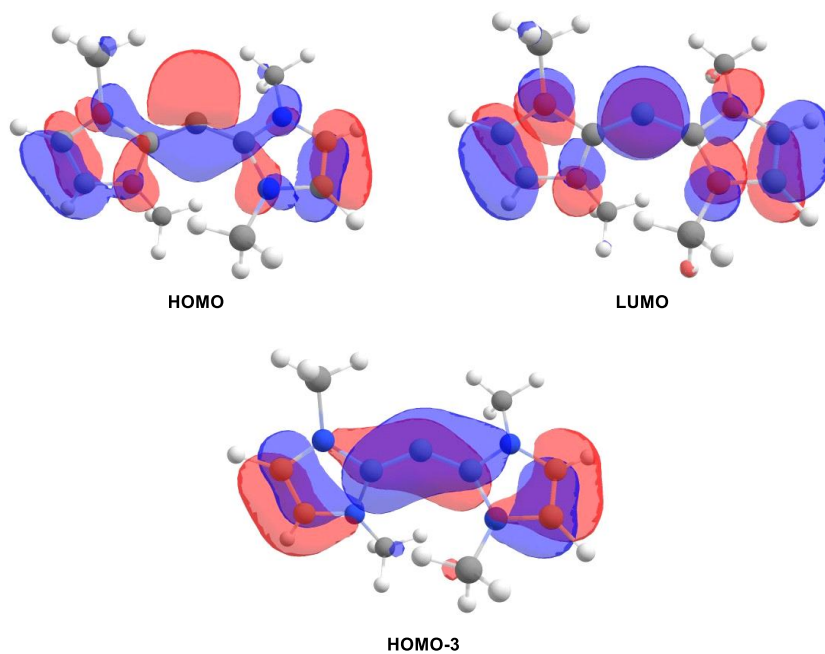

### Natural resonance theory

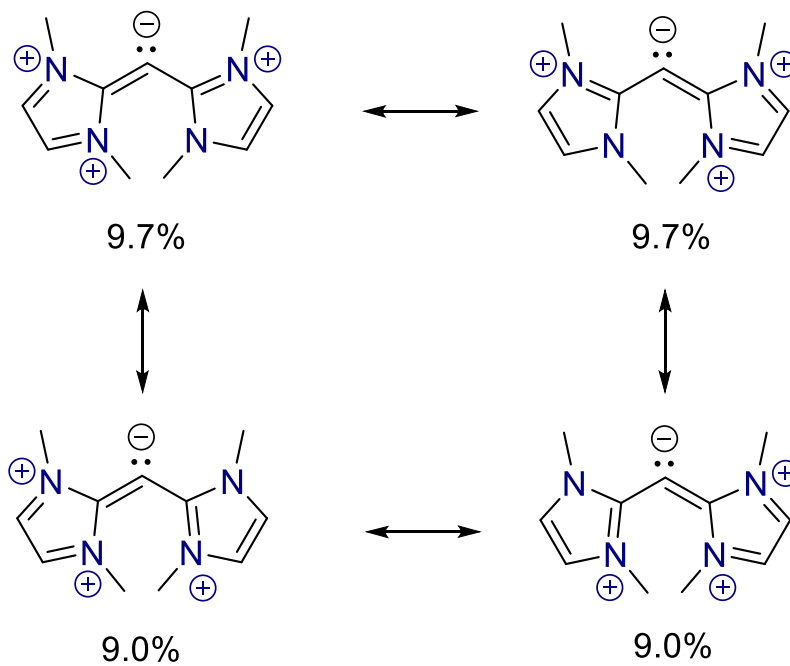

## 2.8 Triplet dication 8

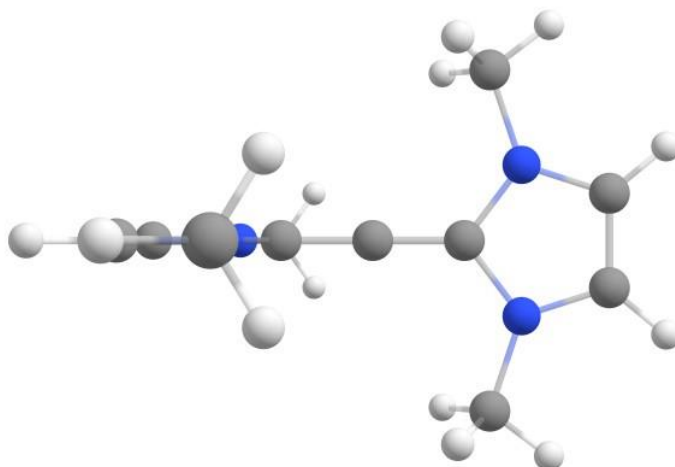

**Figure S8.** Optimized geometry of **38** (in Å) at the B3LYP-D3/def2-TZVPP level of theory. The electronic energy is given in units of  $E_h$  and the ZPVE in  $\text{kcal mol}^{-1}$ .

|   |              |              |              |
|---|--------------|--------------|--------------|
| 6 | 0.000000000  | 0.000000000  | 0.000000000  |
| 6 | 0.000000000  | 0.000000000  | 1.342055000  |
| 6 | 0.000000000  | 0.000000000  | -1.342055000 |
| 7 | 0.000000000  | -1.105565000 | 2.179135000  |
| 7 | 0.000000000  | 1.105565000  | 2.179135000  |
| 7 | -1.105565000 | 0.000000000  | -2.179135000 |
| 7 | 1.105565000  | 0.000000000  | -2.179135000 |
| 6 | 0.000000000  | -0.690375000 | 3.465580000  |
| 6 | 0.000000000  | 0.690375000  | 3.465580000  |
| 6 | -0.690375000 | 0.000000000  | -3.465580000 |
| 6 | 0.690375000  | 0.000000000  | -3.465580000 |
| 1 | 0.000000000  | -1.374941000 | 4.296612000  |
| 1 | 0.000000000  | 1.374941000  | 4.296612000  |
| 1 | -1.374941000 | 0.000000000  | -4.296612000 |
| 1 | 1.374941000  | 0.000000000  | -4.296612000 |
| 6 | -2.494125000 | 0.000000000  | -1.714948000 |
| 1 | -2.682179000 | 0.891322000  | -1.120022000 |
| 1 | -3.149577000 | 0.000000000  | -2.580169000 |
| 1 | -2.682179000 | -0.891322000 | -1.120022000 |
| 6 | 2.494125000  | 0.000000000  | -1.714948000 |
| 1 | 3.149577000  | 0.000000000  | -2.580169000 |
| 1 | 2.682179000  | 0.891322000  | -1.120022000 |
| 1 | 2.682179000  | -0.891322000 | -1.120022000 |
| 6 | 0.000000000  | 2.494125000  | 1.714948000  |
| 1 | -0.891322000 | 2.682179000  | 1.120022000  |
| 1 | 0.000000000  | 3.149577000  | 2.580169000  |
| 1 | 0.891322000  | 2.682179000  | 1.120022000  |
| 6 | 0.000000000  | -2.494125000 | 1.714948000  |
| 1 | 0.000000000  | -3.149577000 | 2.580169000  |
| 1 | -0.891322000 | -2.682179000 | 1.120022000  |
| 1 | 0.891322000  | -2.682179000 | 1.120022000  |

B3LYP-D3/def2-TZVPP: -647.4355484  
ZPVE: 164.53957  
G4MP2(0K): -646.158661

**Selected orbitals (ROKS)**

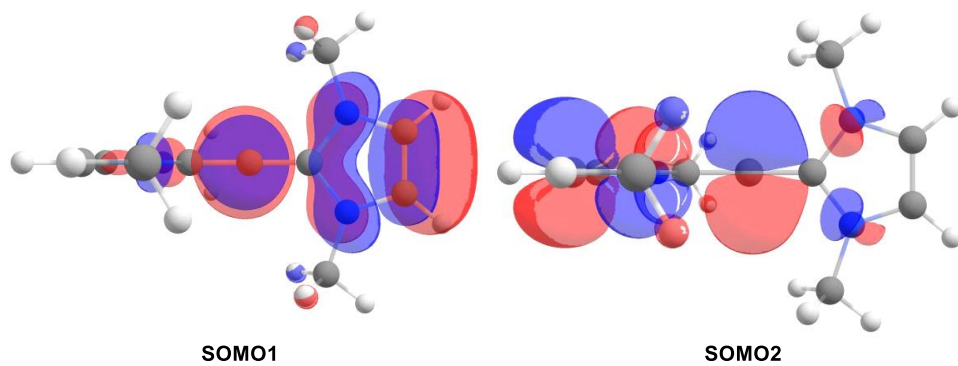

## 2.9 Singlet dication 9

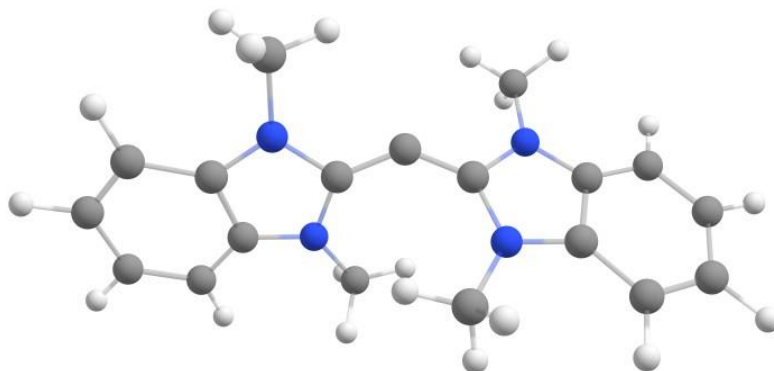

**Figure S9.** Optimized geometry of **19** (in Å) at the B3LYP-D3/def2-TZVPP level of theory. The electronic energy is given in units of  $E_h$  and the ZPVE in  $\text{kcal mol}^{-1}$ .

|   |              |              |              |
|---|--------------|--------------|--------------|
| 6 | 0.000000000  | 0.000000000  | 1.009089000  |
| 6 | 0.107888000  | 1.259199000  | 0.495028000  |
| 6 | -0.107888000 | -1.259199000 | 0.495028000  |
| 7 | -0.311498000 | 2.385727000  | 1.186690000  |
| 7 | 0.739135000  | 1.722699000  | -0.655921000 |
| 7 | -0.739135000 | -1.722699000 | -0.655921000 |
| 7 | 0.311498000  | -2.385727000 | 1.186690000  |
| 6 | 0.000000000  | 3.503640000  | 0.485419000  |
| 6 | 0.732268000  | 3.084100000  | -0.660658000 |
| 6 | -0.732268000 | -3.084100000 | -0.660658000 |
| 6 | 0.000000000  | -3.503640000 | 0.485419000  |
| 6 | -1.466837000 | -0.917346000 | -1.632321000 |
| 1 | -1.377184000 | 0.132116000  | -1.379731000 |
| 1 | -1.056264000 | -1.092627000 | -2.625168000 |
| 1 | -2.519825000 | -1.194183000 | -1.623476000 |
| 6 | 1.025570000  | -2.354677000 | 2.460362000  |
| 1 | 0.676367000  | -3.179726000 | 3.075807000  |
| 1 | 2.098235000  | -2.445467000 | 2.296718000  |
| 1 | 0.810827000  | -1.404962000 | 2.942700000  |
| 6 | 1.466837000  | 0.917346000  | -1.632321000 |
| 1 | 1.377184000  | -0.132116000 | -1.379731000 |
| 1 | 1.056264000  | 1.092627000  | -2.625168000 |
| 1 | 2.519825000  | 1.194183000  | -1.623476000 |
| 6 | -1.025570000 | 2.354677000  | 2.460362000  |
| 1 | -0.676367000 | 3.179726000  | 3.075807000  |
| 1 | -2.098235000 | 2.445467000  | 2.296718000  |
| 1 | -0.810827000 | 1.404962000  | 2.942700000  |
| 6 | -0.249955000 | 4.858693000  | 0.737253000  |
| 1 | -0.819937000 | 5.182892000  | 1.595008000  |
| 6 | 0.286962000  | 5.756044000  | -0.155522000 |
| 1 | 0.137439000  | 6.815049000  | 0.001453000  |
| 6 | 1.285414000  | 4.007290000  | -1.552838000 |
| 1 | 1.854429000  | 3.697562000  | -2.416726000 |



|   |              |              |              |
|---|--------------|--------------|--------------|
| 6 | 1.043982000  | 5.336262000  | -1.285679000 |
| 1 | 1.433031000  | 6.090385000  | -1.955492000 |
| 6 | 0.249955000  | -4.858693000 | 0.737253000  |
| 1 | 0.819937000  | -5.182892000 | 1.595008000  |
| 6 | -0.286962000 | -5.756044000 | -0.155522000 |
| 1 | -0.137439000 | -6.815049000 | 0.001453000  |
| 6 | -1.285414000 | -4.007290000 | -1.552838000 |
| 1 | -1.854429000 | -3.697562000 | -2.416726000 |
| 6 | -1.043982000 | -5.336262000 | -1.285679000 |
| 1 | -1.433031000 | -6.090385000 | -1.955492000 |

B3LYP-D3/def2-TZVPP: -954.8684627

ZPVE: 224.58955

G4MP2(0K): ---

### Selected orbitals

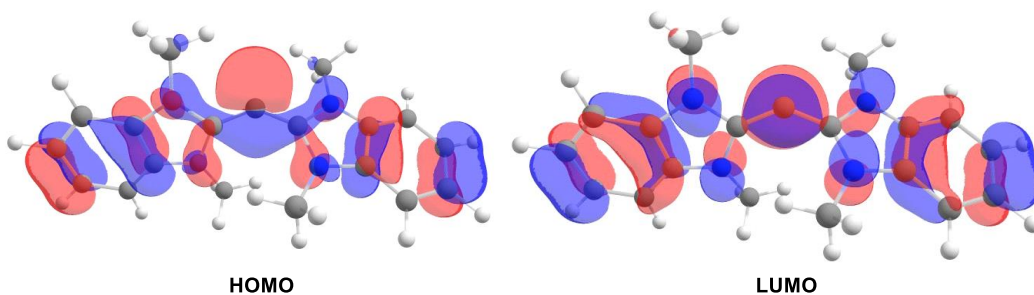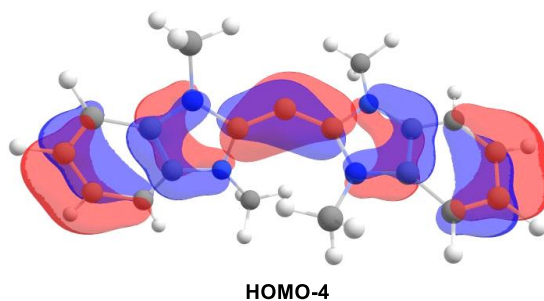

## 2.10 Triplet dication **9**

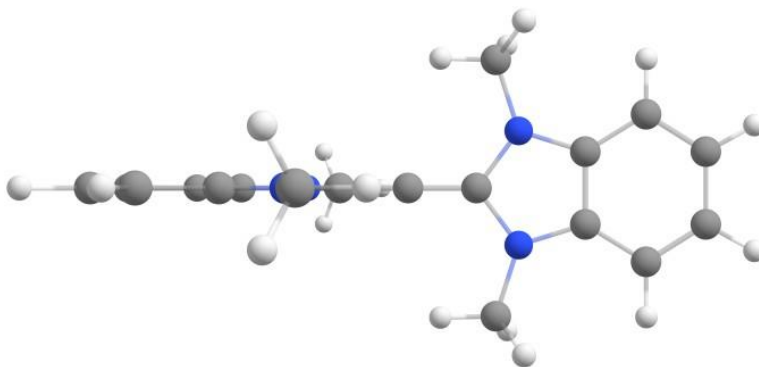

**Figure S10.** Optimized geometry of **39** (in Å) at the B3LYP-D3/def2-TZVPP level of theory. The electronic energy is given in units of  $E_h$  and the ZPVE in  $\text{kcal mol}^{-1}$ .

|   |              |              |              |
|---|--------------|--------------|--------------|
| 6 | 0.000000000  | 0.000000000  | 0.000000000  |
| 6 | 0.000000000  | 0.000000000  | 1.339430000  |
| 6 | 0.000000000  | 0.000000000  | -1.339430000 |
| 7 | 0.000000000  | -1.114802000 | 2.165114000  |
| 7 | 0.000000000  | 1.114802000  | 2.165114000  |
| 7 | -1.114802000 | 0.000000000  | -2.165114000 |
| 7 | 1.114802000  | 0.000000000  | -2.165114000 |
| 6 | 0.000000000  | -0.710510000 | 3.469002000  |
| 6 | 0.000000000  | 0.710510000  | 3.469002000  |
| 6 | -0.710510000 | 0.000000000  | -3.469002000 |
| 6 | 0.710510000  | 0.000000000  | -3.469002000 |
| 6 | -2.504199000 | 0.000000000  | -1.718149000 |
| 1 | -2.530021000 | 0.000000000  | -0.632963000 |
| 1 | -3.009403000 | 0.889425000  | -2.090884000 |
| 1 | -3.009403000 | -0.889425000 | -2.090884000 |
| 6 | 2.504199000  | 0.000000000  | -1.718149000 |
| 1 | 3.009403000  | -0.889425000 | -2.090884000 |
| 1 | 3.009403000  | 0.889425000  | -2.090884000 |
| 1 | 2.530021000  | 0.000000000  | -0.632963000 |
| 6 | 0.000000000  | 2.504199000  | 1.718149000  |
| 1 | 0.000000000  | 2.530021000  | 0.632963000  |
| 1 | -0.889425000 | 3.009403000  | 2.090884000  |
| 1 | 0.889425000  | 3.009403000  | 2.090884000  |
| 6 | 0.000000000  | -2.504199000 | 1.718149000  |
| 1 | 0.889425000  | -3.009403000 | 2.090884000  |
| 1 | -0.889425000 | -3.009403000 | 2.090884000  |
| 1 | 0.000000000  | -2.530021000 | 0.632963000  |
| 6 | 0.000000000  | -1.441070000 | 4.657927000  |
| 1 | 0.000000000  | -2.520908000 | 4.664112000  |
| 6 | 0.000000000  | -0.710164000 | 5.827556000  |
| 1 | 0.000000000  | -1.228320000 | 6.776217000  |
| 6 | 0.000000000  | 1.441070000  | 4.657927000  |
| 1 | 0.000000000  | 2.520908000  | 4.664112000  |
| 6 | 0.000000000  | 0.710164000  | 5.827556000  |

|   |              |             |              |
|---|--------------|-------------|--------------|
| 1 | 0.000000000  | 1.228320000 | 6.776217000  |
| 6 | 1.441070000  | 0.000000000 | -4.657927000 |
| 1 | 2.520908000  | 0.000000000 | -4.664112000 |
| 6 | 0.710164000  | 0.000000000 | -5.827556000 |
| 1 | 1.228320000  | 0.000000000 | -6.776217000 |
| 6 | -1.441070000 | 0.000000000 | -4.657927000 |
| 1 | -2.520908000 | 0.000000000 | -4.664112000 |
| 6 | -0.710164000 | 0.000000000 | -5.827556000 |
| 1 | -1.228320000 | 0.000000000 | -6.776217000 |

B3LYP-D3/def2-TZVPP: -954.8745939

ZPVE: 223.17079

G4MP2(0K): ---

### Selected orbitals (ROKS)

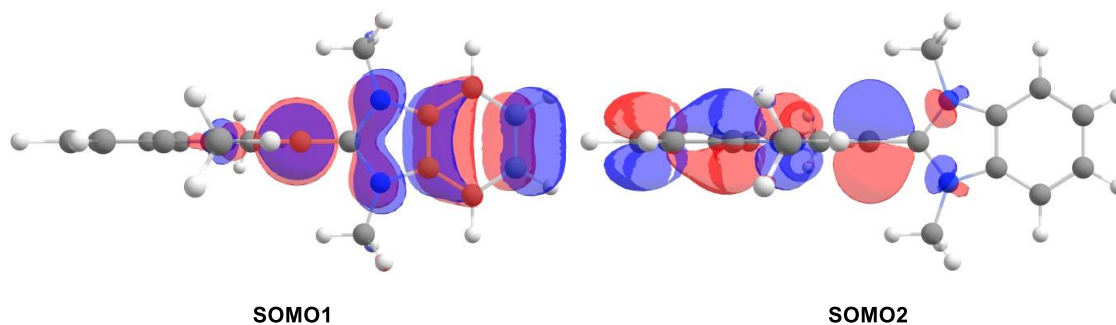

## 2.11 Singlet dication 10

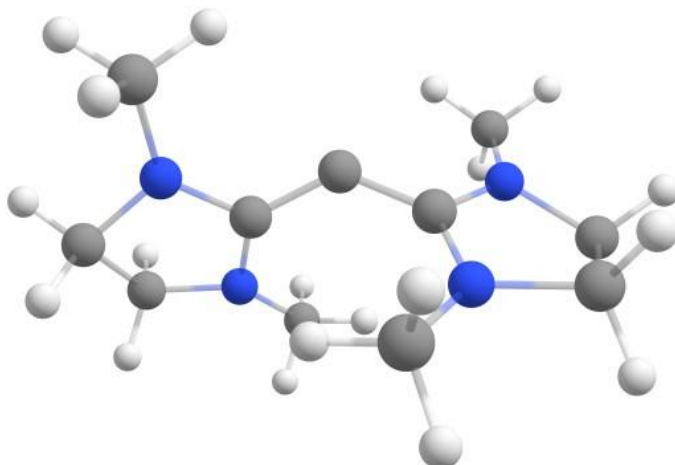

**Figure S11.** Optimized geometry of  ${}^1\mathbf{10}$  (in Å) at the B3LYP-D3/def2-TZVPP level of theory. The electronic energy is given in units of  $E_h$  and the ZPVE in  $\text{kcal mol}^{-1}$ .

|   |              |              |              |
|---|--------------|--------------|--------------|
| 6 | 0.000000000  | 0.000000000  | 0.831569000  |
| 6 | 0.000000000  | 1.276817000  | 0.242299000  |
| 6 | 0.000000000  | -1.276817000 | 0.242299000  |
| 7 | -0.788224000 | 2.253515000  | 0.715673000  |
| 7 | 0.821290000  | 1.719963000  | -0.728880000 |
| 7 | -0.821290000 | -1.719963000 | -0.728880000 |
| 7 | 0.788224000  | -2.253515000 | 0.715673000  |
| 6 | -0.627593000 | 3.451020000  | -0.127072000 |
| 6 | 0.739040000  | 3.196849000  | -0.769744000 |
| 6 | -0.739040000 | -3.196849000 | -0.769744000 |
| 6 | 0.627593000  | -3.451020000 | -0.127072000 |
| 1 | -0.662235000 | 4.345213000  | 0.492515000  |
| 1 | 0.806021000  | 3.543457000  | -1.798630000 |
| 1 | -1.563969000 | -3.625658000 | -0.195225000 |
| 1 | 1.438696000  | -3.501022000 | -0.858265000 |
| 1 | -1.438696000 | 3.501022000  | -0.858265000 |
| 1 | 1.563969000  | 3.625658000  | -0.195225000 |
| 1 | -0.806021000 | -3.543457000 | -1.798630000 |
| 1 | 0.662235000  | -4.345213000 | 0.492515000  |
| 6 | 1.837860000  | -2.121571000 | 1.714696000  |
| 1 | 2.812510000  | -1.982857000 | 1.242520000  |
| 1 | 1.620744000  | -1.265867000 | 2.353679000  |
| 1 | 1.863028000  | -3.031115000 | 2.311035000  |
| 6 | -1.955531000 | -1.019690000 | -1.314286000 |
| 1 | -2.873454000 | -1.236391000 | -0.763756000 |
| 1 | -1.776901000 | 0.052805000  | -1.318863000 |
| 1 | -2.075128000 | -1.353636000 | -2.342621000 |
| 6 | 1.955531000  | 1.019690000  | -1.314286000 |
| 1 | 2.075128000  | 1.353636000  | -2.342621000 |
| 1 | 2.873454000  | 1.236391000  | -0.763756000 |
| 1 | 1.776901000  | -0.052805000 | -1.318863000 |

|   |              |             |             |
|---|--------------|-------------|-------------|
| 6 | -1.837860000 | 2.121571000 | 1.714696000 |
| 1 | -1.620744000 | 1.265867000 | 2.353679000 |
| 1 | -1.863028000 | 3.031115000 | 2.311035000 |
| 1 | -2.812510000 | 1.982857000 | 1.242520000 |

B3LYP-D3/def2-TZVPP: -649.8000057

ZPVE: 193.39445

G4MP2(0K): -648.4777

### Selected orbitals

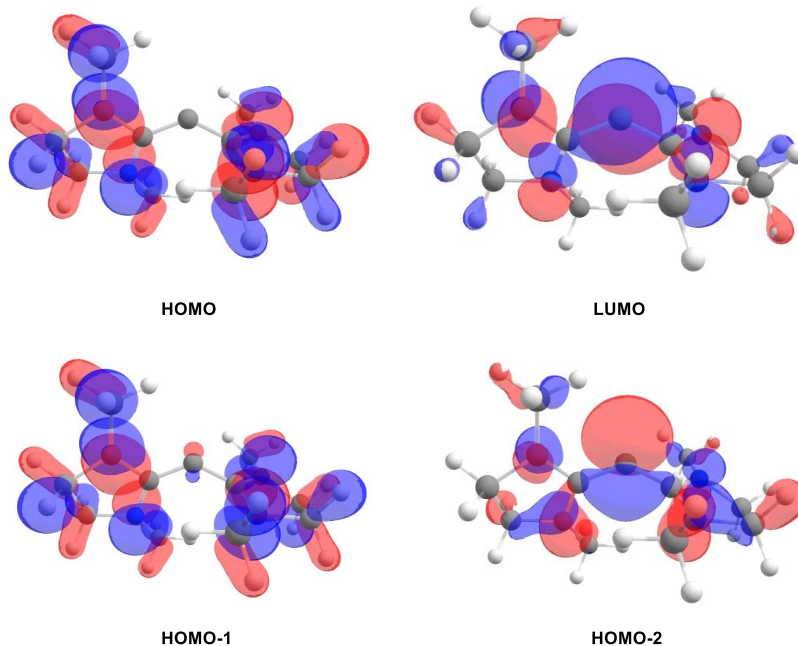

### Natural resonance theory

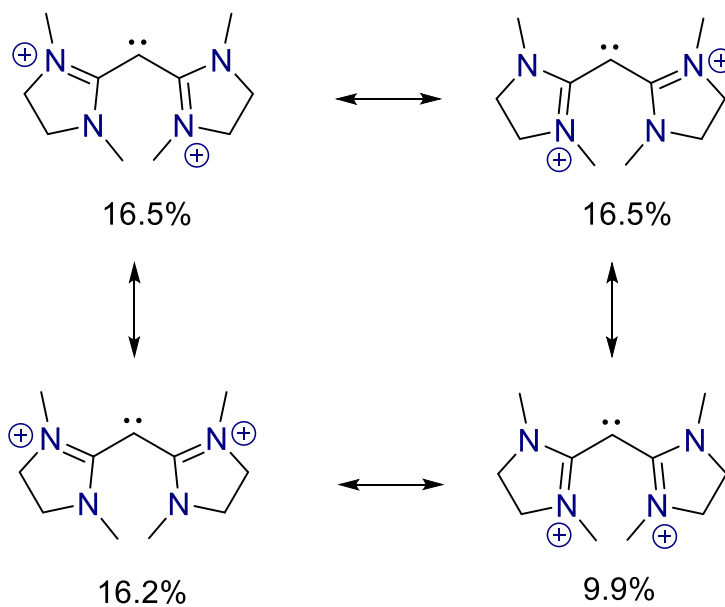

## 2.12 Triplet dication 10

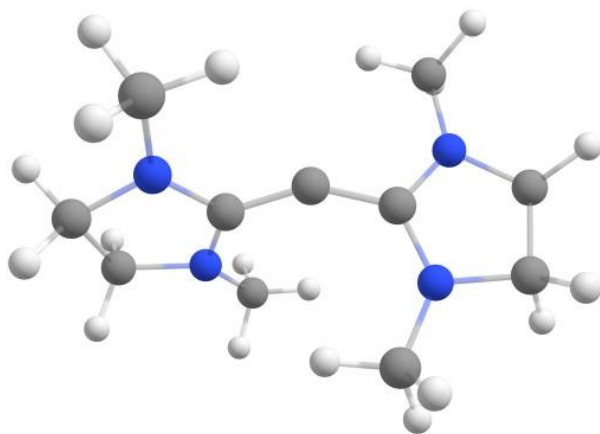

**Figure S12.** Optimized geometry of  ${}^3\mathbf{10}$  (in Å) at the B3LYP-D3/def2-TZVPP level of theory. The electronic energy is given in units of  $E_h$  and the ZPVE in  $\text{kcal mol}^{-1}$ .

|   |              |              |              |
|---|--------------|--------------|--------------|
| 6 | 0.000000000  | 0.000000000  | 0.540806000  |
| 6 | 0.332614000  | 1.319014000  | 0.170369000  |
| 6 | -0.332614000 | -1.319014000 | 0.170369000  |
| 7 | 0.000000000  | 2.366785000  | 0.922594000  |
| 7 | 1.027046000  | 1.661817000  | -0.918923000 |
| 7 | -1.027046000 | -1.661817000 | -0.918923000 |
| 7 | 0.000000000  | -2.366785000 | 0.922594000  |
| 6 | 0.443232000  | 3.616296000  | 0.274942000  |
| 6 | 1.323119000  | 3.111468000  | -0.883555000 |
| 6 | -1.323119000 | -3.111468000 | -0.883555000 |
| 6 | -0.443232000 | -3.616296000 | 0.274942000  |
| 1 | 0.983125000  | 4.235210000  | 0.989112000  |
| 1 | 1.075701000  | 3.566985000  | -1.839967000 |
| 1 | -2.389191000 | -3.249857000 | -0.695254000 |
| 1 | 0.435195000  | -4.166790000 | -0.066617000 |
| 1 | -0.435195000 | 4.166790000  | -0.066617000 |
| 1 | 2.389191000  | 3.249857000  | -0.695254000 |
| 1 | -1.075701000 | -3.566985000 | -1.839967000 |
| 1 | -0.983125000 | -4.235210000 | 0.989112000  |
| 6 | 0.847009000  | -2.382676000 | 2.106750000  |
| 1 | 1.773738000  | -2.916186000 | 1.890493000  |
| 1 | 1.078985000  | -1.367074000 | 2.418381000  |
| 1 | 0.325053000  | -2.893869000 | 2.914971000  |
| 6 | -1.737020000 | -0.783927000 | -1.838626000 |
| 1 | -2.806830000 | -0.796468000 | -1.622384000 |
| 1 | -1.367441000 | 0.234535000  | -1.758847000 |
| 1 | -1.579893000 | -1.134486000 | -2.857281000 |
| 6 | 1.737020000  | 0.783927000  | -1.838626000 |
| 1 | 1.579893000  | 1.134486000  | -2.857281000 |
| 1 | 2.806830000  | 0.796468000  | -1.622384000 |
| 1 | 1.367441000  | -0.234535000 | -1.758847000 |
| 6 | -0.847009000 | 2.382676000  | 2.106750000  |

|   |              |             |             |
|---|--------------|-------------|-------------|
| 1 | -1.078985000 | 1.367074000 | 2.418381000 |
| 1 | -0.325053000 | 2.893869000 | 2.914971000 |
| 1 | -1.773738000 | 2.916186000 | 1.890493000 |

B3LYP-D3/def2-TZVPP: -649.8203097

ZPVE: 193.60823

G4MP2(0K): -648.503829

### Selected orbitals (ROKS)

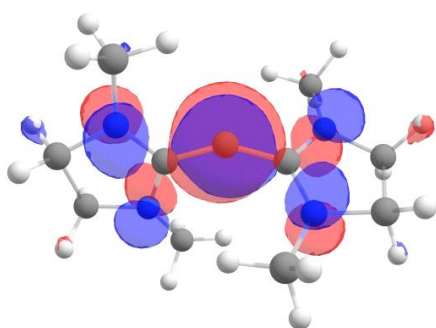

SOMO1

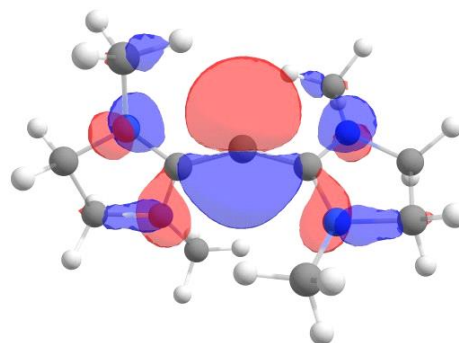

SOMO2

### 2.13 Singlet dication **11**

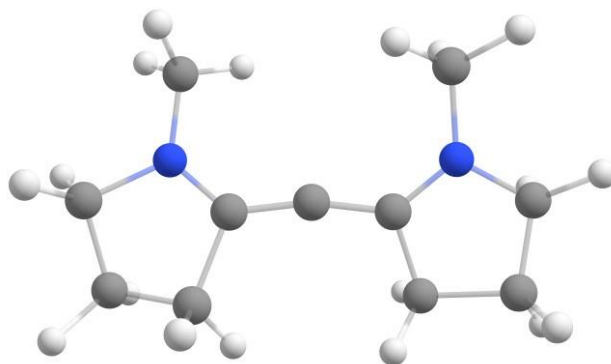

**Figure S13.** Optimized geometry of **11** (in Å) at the B3LYP-D3/def2-TZVPP level of theory. The electronic energy is given in units of  $E_h$  and the ZPVE in  $\text{kcal mol}^{-1}$ .

|   |              |              |              |
|---|--------------|--------------|--------------|
| 6 | 0.000000000  | 0.021372000  | 0.000001000  |
| 6 | 1.328719000  | -0.133125000 | -0.046279000 |
| 6 | -1.328719000 | -0.133125000 | 0.046279000  |
| 7 | 2.320676000  | 0.707060000  | 0.094429000  |
| 6 | 1.845460000  | -1.564447000 | -0.362031000 |
| 6 | -1.845461000 | -1.564447000 | 0.362030000  |
| 7 | -2.320675000 | 0.707060000  | -0.094430000 |
| 6 | 3.639464000  | 0.051817000  | -0.109112000 |
| 6 | 3.313161000  | -1.421568000 | 0.101351000  |
| 6 | -3.313162000 | -1.421567000 | -0.101351000 |
| 6 | -3.639464000 | 0.051818000  | 0.109112000  |
| 1 | 4.348454000  | 0.457564000  | 0.610181000  |
| 1 | 3.951568000  | -2.085310000 | -0.479990000 |
| 1 | 1.295932000  | -2.345575000 | 0.156600000  |
| 1 | -1.295934000 | -2.345576000 | -0.156601000 |
| 1 | -3.398807000 | -1.687855000 | -1.152898000 |
| 1 | -3.992316000 | 0.281861000  | 1.116328000  |
| 1 | 3.992316000  | 0.281860000  | -1.116328000 |
| 1 | 3.398805000  | -1.687855000 | 1.152898000  |
| 1 | -3.951570000 | -2.085309000 | 0.479991000  |
| 1 | -4.348453000 | 0.457566000  | -0.610182000 |
| 1 | 1.740957000  | -1.706689000 | -1.439501000 |
| 1 | -1.740957000 | -1.706691000 | 1.439501000  |
| 6 | 2.190807000  | 2.155031000  | 0.254640000  |
| 1 | 2.995429000  | 2.507202000  | 0.895730000  |
| 1 | 2.266352000  | 2.649201000  | -0.714953000 |
| 1 | 1.233549000  | 2.389814000  | 0.718549000  |
| 6 | -2.190806000 | 2.155031000  | -0.254640000 |
| 1 | -2.266351000 | 2.649200000  | 0.714953000  |
| 1 | -1.233547000 | 2.389814000  | -0.718549000 |
| 1 | -2.995427000 | 2.507202000  | -0.895730000 |

B3LYP-D3/def2-TZVPP: -539.0461529  
ZPVE: 172.68867



G4MP2(0K):

-537.903667

**Selected orbitals**

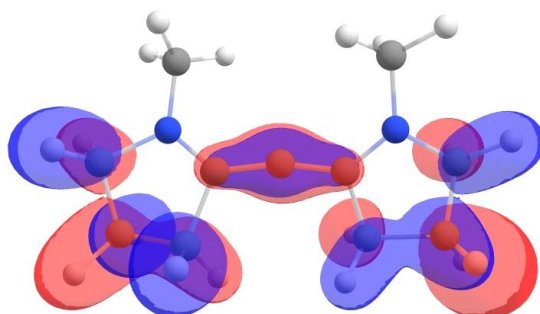

HOMO-2

## 2.14 Triplet dication 11

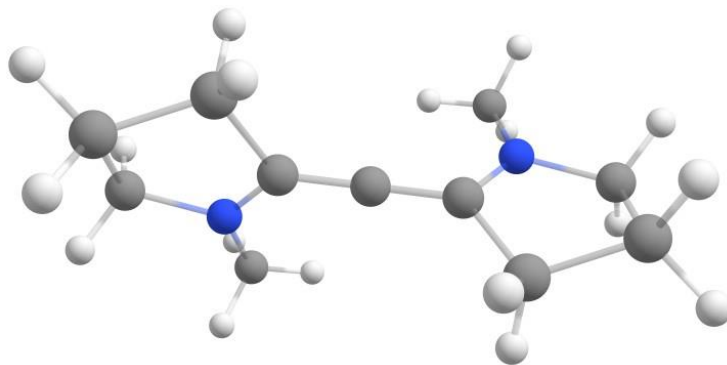

**Figure S14.** Optimized geometry of  ${}^3\mathbf{11}$  (in Å) at the B3LYP-D3/def2-TZVPP level of theory. The electronic energy is given in units of  $E_h$  and the ZPVE in  $\text{kcal mol}^{-1}$ .

|   |              |              |              |
|---|--------------|--------------|--------------|
| 6 | 0.000000000  | 0.000000000  | 0.084815000  |
| 6 | 0.000000000  | 1.343496000  | -0.131165000 |
| 6 | 0.000000000  | -1.343496000 | -0.131165000 |
| 7 | 0.746303000  | 2.215114000  | 0.546573000  |
| 6 | -0.887101000 | 2.066164000  | -1.129643000 |
| 6 | 0.887101000  | -2.066164000 | -1.129643000 |
| 7 | -0.746303000 | -2.215114000 | 0.546573000  |
| 6 | 0.502884000  | 3.608195000  | 0.113605000  |
| 6 | -0.218279000 | 3.452698000  | -1.225679000 |
| 6 | 0.218279000  | -3.452698000 | -1.225679000 |
| 6 | -0.502884000 | -3.608195000 | 0.113605000  |
| 1 | 1.453128000  | 4.138888000  | 0.068652000  |
| 1 | -0.942933000 | 4.244405000  | -1.394869000 |
| 1 | -0.948168000 | 1.538622000  | -2.078851000 |
| 1 | 0.948168000  | -1.538622000 | -2.078851000 |
| 1 | -0.500026000 | -3.469879000 | -2.043389000 |
| 1 | 0.110448000  | -4.081656000 | 0.887760000  |
| 1 | -0.110448000 | 4.081656000  | 0.887760000  |
| 1 | 0.500026000  | 3.469879000  | -2.043389000 |
| 1 | 0.942933000  | -4.244405000 | -1.394869000 |
| 1 | -1.453128000 | -4.138888000 | 0.068652000  |
| 1 | -1.896306000 | 2.118176000  | -0.713163000 |
| 1 | 1.896306000  | -2.118176000 | -0.713163000 |
| 6 | 1.678886000  | 1.923824000  | 1.624819000  |
| 1 | 2.676748000  | 2.243853000  | 1.320349000  |
| 1 | 1.388059000  | 2.501168000  | 2.504086000  |
| 1 | 1.680561000  | 0.863291000  | 1.857335000  |
| 6 | -1.678886000 | -1.923824000 | 1.624819000  |
| 1 | -1.388059000 | -2.501168000 | 2.504086000  |
| 1 | -1.680561000 | -0.863291000 | 1.857335000  |
| 1 | -2.676748000 | -2.243853000 | 1.320349000  |

B3LYP-D3/def2-TZVPP: -539.0575207  
ZPVE: 172.18286

G4MP2(0K):

-537.920976

**Selected orbitals (ROKS)**

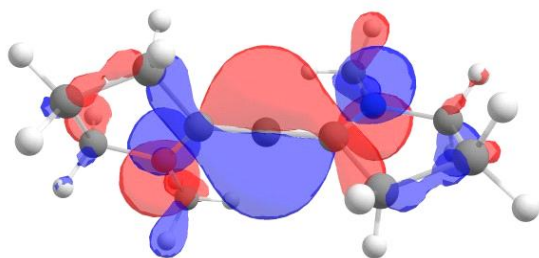

**SOMO1**

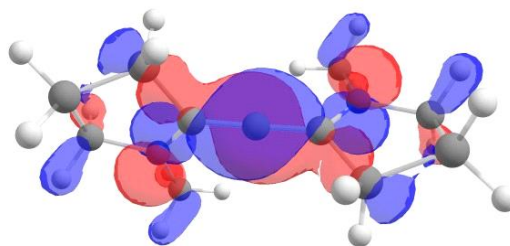

**SOMO2**

## 2.15 Singlet dication 12

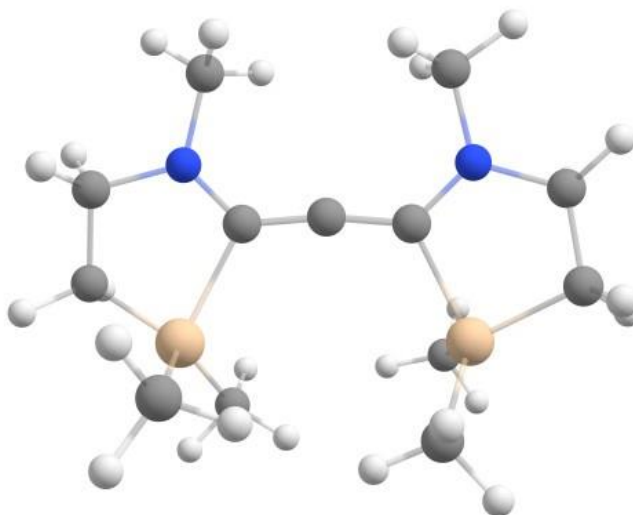

**Figure S15.** Optimized geometry of **12** (in Å) at the B3LYP-D3/def2-TZVPP level of theory. The electronic energy is given in units of  $E_h$  and the ZPVE in  $\text{kcal mol}^{-1}$ .

|    |             |             |             |
|----|-------------|-------------|-------------|
| 6  | 0.00000000  | 0.00000000  | 0.77171800  |
| 6  | -0.09227600 | 1.30988100  | 0.66725900  |
| 6  | 0.09227600  | -1.30988100 | 0.66725900  |
| 7  | -0.10467700 | 2.24219600  | 1.59313500  |
| 14 | -0.35268300 | 2.21550600  | -1.15993300 |
| 14 | 0.35268300  | -2.21550600 | -1.15993300 |
| 7  | 0.10467700  | -2.24219600 | 1.59313500  |
| 6  | -0.31313100 | 3.66214900  | 1.20384300  |
| 6  | 0.00000000  | 3.83614800  | -0.27376800 |
| 6  | 0.00000000  | -3.83614800 | -0.27376800 |
| 6  | 0.31313100  | -3.66214900 | 1.20384300  |
| 1  | 0.33199000  | 4.26716700  | 1.83921400  |
| 1  | -0.59155100 | 4.64428200  | -0.70631000 |
| 1  | -1.05248300 | -4.08491300 | -0.41820700 |
| 1  | 1.34702600  | -3.92125100 | 1.44133000  |
| 1  | -1.34702600 | 3.92125100  | 1.44133000  |
| 1  | 1.05248300  | 4.08491300  | -0.41820700 |
| 1  | 0.59155100  | -4.64428200 | -0.70631000 |
| 1  | -0.33199000 | -4.26716700 | 1.83921400  |
| 6  | -0.08230300 | 1.90461800  | 3.02168400  |
| 1  | 0.11367800  | 2.80253000  | 3.59963700  |
| 1  | -1.04524400 | 1.49035600  | 3.32512400  |
| 1  | 0.70952300  | 1.18007500  | 3.21039600  |
| 6  | 0.08230300  | -1.90461800 | 3.02168400  |
| 1  | 1.04524400  | -1.49035600 | 3.32512400  |
| 1  | -0.70952300 | -1.18007500 | 3.21039600  |
| 1  | -0.11367800 | -2.80253000 | 3.59963700  |
| 6  | 0.95432600  | 1.72613200  | -2.37571100 |
| 1  | 0.77836300  | 0.76605900  | -2.85492800 |

|   |              |              |              |
|---|--------------|--------------|--------------|
| 1 | 0.960107000  | 2.480623000  | -3.168730000 |
| 1 | 1.947257000  | 1.727788000  | -1.925205000 |
| 6 | -2.116669000 | 1.908269000  | -1.631387000 |
| 1 | -2.806477000 | 2.206144000  | -0.840999000 |
| 1 | -2.349311000 | 2.509429000  | -2.515258000 |
| 1 | -2.310370000 | 0.867179000  | -1.885621000 |
| 6 | -0.954326000 | -1.726132000 | -2.375711000 |
| 1 | -0.778363000 | -0.766059000 | -2.854928000 |
| 1 | -0.960107000 | -2.480623000 | -3.168730000 |
| 1 | -1.947257000 | -1.727788000 | -1.925205000 |
| 6 | 2.116669000  | -1.908269000 | -1.631387000 |
| 1 | 2.806477000  | -2.206144000 | -0.840999000 |
| 1 | 2.349311000  | -2.509429000 | -2.515258000 |
| 1 | 2.310370000  | -0.867179000 | -1.885621000 |

B3LYP-D3/def2-TZVPP: -1199.3057965

ZPVE: 230.34931

G4MP2(0K): -1197.068858

### Selected orbitals

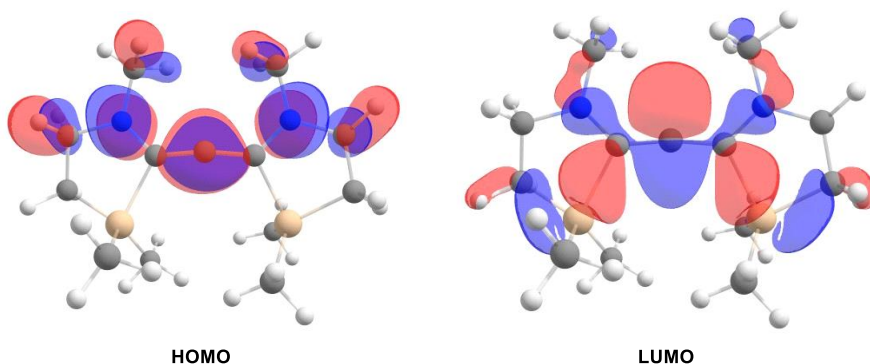

### Natural resonance theory

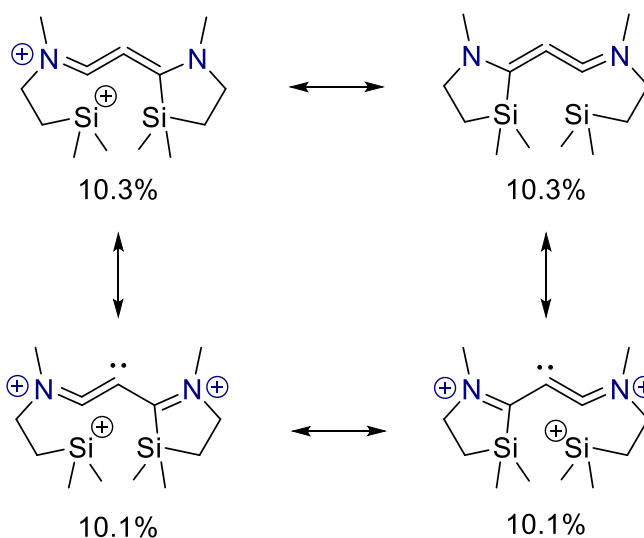

## 2.16 Triplet dication 12

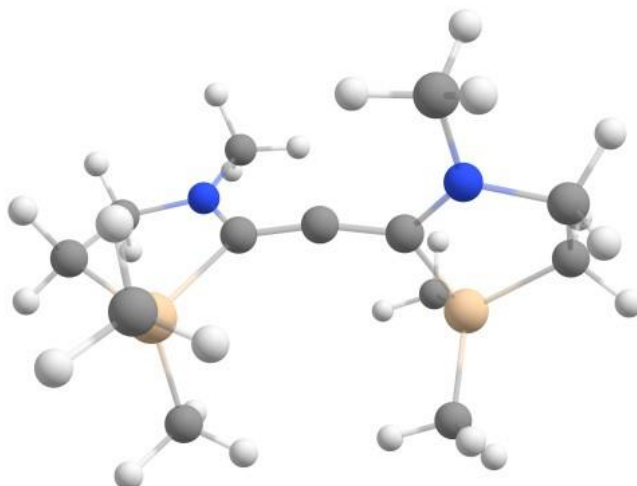

**Figure S16.** Optimized geometry of  ${}^3\mathbf{12}$  (in Å) at the B3LYP-D3/def2-TZVPP level of theory. The electronic energy is given in units of  $E_h$  and the ZPVE in  $\text{kcal mol}^{-1}$ .

|    |              |              |              |
|----|--------------|--------------|--------------|
| 6  | 0.000000000  | 0.000000000  | 0.609481000  |
| 6  | 0.000000000  | 1.332078000  | 0.457322000  |
| 6  | 0.000000000  | -1.332078000 | 0.457322000  |
| 7  | 0.763663000  | 2.190380000  | 1.142387000  |
| 14 | -1.165597000 | 2.314081000  | -0.805353000 |
| 14 | 1.165597000  | -2.314081000 | -0.805353000 |
| 7  | -0.763663000 | -2.190380000 | 1.142387000  |
| 6  | 0.629500000  | 3.636668000  | 0.831018000  |
| 6  | -0.668353000 | 3.910298000  | 0.075589000  |
| 6  | 0.668353000  | -3.910298000 | 0.075589000  |
| 6  | -0.629500000 | -3.636668000 | 0.831018000  |
| 1  | 1.514603000  | 3.904868000  | 0.245734000  |
| 1  | -1.459089000 | 4.192226000  | 0.772417000  |
| 1  | 0.537360000  | -4.740679000 | -0.617291000 |
| 1  | -0.702543000 | -4.174075000 | 1.777317000  |
| 1  | 0.702543000  | 4.174075000  | 1.777317000  |
| 1  | -0.537360000 | 4.740679000  | -0.617291000 |
| 1  | 1.459089000  | -4.192226000 | 0.772417000  |
| 1  | -1.514603000 | -3.904868000 | 0.245734000  |
| 6  | 1.760010000  | 1.814618000  | 2.142354000  |
| 1  | 2.710636000  | 2.284014000  | 1.887558000  |
| 1  | 1.442903000  | 2.190288000  | 3.116628000  |
| 1  | 1.876174000  | 0.736263000  | 2.178827000  |
| 6  | -1.760010000 | -1.814618000 | 2.142354000  |
| 1  | -1.442903000 | -2.190288000 | 3.116628000  |
| 1  | -1.876174000 | -0.736263000 | 2.178827000  |
| 1  | -2.710636000 | -2.284014000 | 1.887558000  |
| 6  | -0.473372000 | 2.079845000  | -2.511999000 |
| 1  | -0.637005000 | 1.063952000  | -2.874220000 |
| 1  | -0.986411000 | 2.753144000  | -3.203376000 |

|   |              |              |              |
|---|--------------|--------------|--------------|
| 1 | 0.592643000  | 2.303693000  | -2.566165000 |
| 6 | -2.926236000 | 1.775850000  | -0.591331000 |
| 1 | -3.256523000 | 1.847919000  | 0.445350000  |
| 1 | -3.578204000 | 2.417485000  | -1.189161000 |
| 1 | -3.079019000 | 0.753568000  | -0.941525000 |
| 6 | 0.473372000  | -2.079845000 | -2.511999000 |
| 1 | 0.637005000  | -1.063952000 | -2.874220000 |
| 1 | 0.986411000  | -2.753144000 | -3.203376000 |
| 1 | -0.592643000 | -2.303693000 | -2.566165000 |
| 6 | 2.926236000  | -1.775850000 | -0.591331000 |
| 1 | 3.256523000  | -1.847919000 | 0.445350000  |
| 1 | 3.578204000  | -2.417485000 | -1.189161000 |
| 1 | 3.079019000  | -0.753568000 | -0.941525000 |

B3LYP-D3/def2-TZVPP: -1199.288705  
 ZPVE: 229.23014  
 G4MP2(OK): -1197.059739

### Selected orbitals (ROKS)

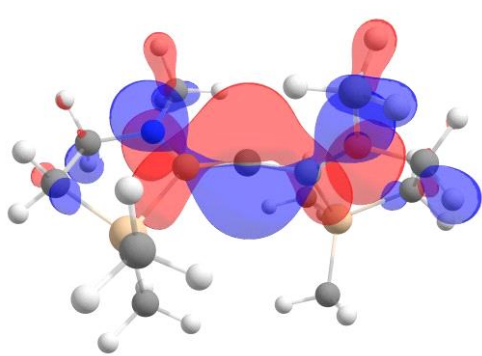

SOMO1

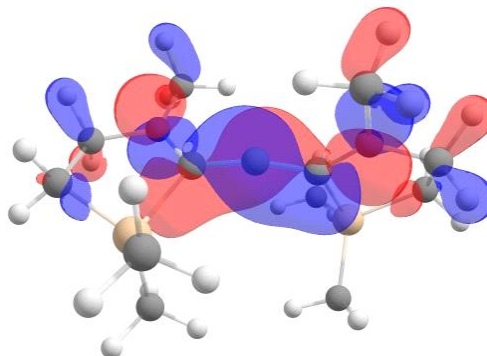

SOMO2

## 2.16 TS-H<sub>2</sub>

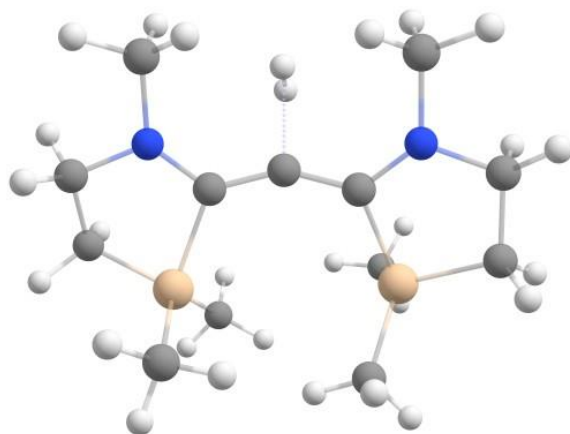

**Figure S16.** Optimized geometry of **TS-H<sub>2</sub>** (in Å) at the B3LYP-D3/def2-TZVPP level of theory. The electronic energy is given in units of  $E_h$  and the ZPVE in kcal mol<sup>-1</sup>.

|    |              |              |              |
|----|--------------|--------------|--------------|
| 6  | -0.005334000 | 0.996423000  | -0.282119000 |
| 6  | -1.331252000 | 0.694152000  | -0.133503000 |
| 6  | 1.309836000  | 0.713121000  | -0.018876000 |
| 7  | -2.357947000 | 1.519112000  | -0.105498000 |
| 14 | -2.075283000 | -1.178289000 | 0.095067000  |
| 14 | 2.114899000  | -1.150060000 | -0.082777000 |
| 7  | 2.302214000  | 1.566581000  | 0.139563000  |
| 6  | -3.749589000 | 0.968203000  | -0.045582000 |
| 6  | -3.748160000 | -0.504791000 | -0.402172000 |
| 6  | 3.740725000  | -0.422070000 | 0.487474000  |
| 6  | 3.712043000  | 1.063303000  | 0.186198000  |
| 1  | -4.350867000 | 1.566317000  | -0.729260000 |
| 1  | -4.556430000 | -1.028169000 | 0.109050000  |
| 1  | 3.847116000  | -0.594714000 | 1.559146000  |
| 1  | 4.160174000  | 1.299830000  | -0.780978000 |
| 1  | -4.118837000 | 1.152135000  | 0.965326000  |
| 1  | -3.892506000 | -0.645270000 | -1.474316000 |
| 1  | 4.585746000  | -0.901899000 | -0.006181000 |
| 1  | 4.231421000  | 1.651234000  | 0.940074000  |
| 6  | -2.308762000 | 2.987258000  | -0.033881000 |
| 1  | -3.219586000 | 3.325439000  | 0.453493000  |
| 1  | -1.465184000 | 3.321070000  | 0.568986000  |
| 1  | -2.265312000 | 3.434273000  | -1.026279000 |
| 6  | 2.194401000  | 3.032231000  | 0.175008000  |
| 1  | 2.194039000  | 3.460558000  | -0.827151000 |
| 1  | 1.301616000  | 3.339977000  | 0.717881000  |
| 1  | 3.058932000  | 3.417971000  | 0.707386000  |
| 6  | -1.449077000 | -2.416736000 | -1.133757000 |
| 1  | -0.488748000 | -2.869179000 | -0.910340000 |
| 1  | -2.186641000 | -3.225653000 | -1.149494000 |
| 1  | -1.421410000 | -1.996269000 | -2.139621000 |
| 6  | -1.934941000 | -1.557212000 | 1.907761000  |



|   |              |              |              |
|---|--------------|--------------|--------------|
| 1 | -2.537292000 | -0.858785000 | 2.490791000  |
| 1 | -2.325268000 | -2.561086000 | 2.093817000  |
| 1 | -0.917353000 | -1.524607000 | 2.288757000  |
| 6 | 1.479533000  | -2.366247000 | 1.164134000  |
| 1 | 0.534697000  | -2.846782000 | 0.935056000  |
| 1 | 2.236257000  | -3.156879000 | 1.207941000  |
| 1 | 1.428546000  | -1.926483000 | 2.160394000  |
| 6 | 2.058884000  | -1.628701000 | -1.875741000 |
| 1 | 2.610542000  | -0.912814000 | -2.487065000 |
| 1 | 2.539377000  | -2.602878000 | -1.998058000 |
| 1 | 1.049684000  | -1.707684000 | -2.274216000 |
| 1 | -0.021981000 | 2.757168000  | -0.577200000 |
| 1 | 0.014944000  | 2.276605000  | -1.198132000 |

B3LYP-D3/def2-TZVPP: -1200.4572775  
ZPVE: 240.70425
